# Supplementary material for: A comparative study of two amphiphilic merocyanines: from monomers to aggregates in Langmuir and Langmuir–Blodgett mixed films
Source: Royal Society of Chemistry journal article supplement (doi:10.1039/c2ra22962e), 2012-11-22
Supplement: c2ra22962e.pdf [file c2ra22962e.pdf]

**Table SI1.**  $^1\text{H}$  NMR chemical shifts (ppm) for merocyanine MC1 in  $\text{CDCl}_3$ . See Scheme 1 for the atom numbering.

| $\delta_1$ | $\delta_2$ | $\delta_3$ | $\delta_4$ | $\delta_5$ | $\delta_6$ | $\delta_7$ | $\delta_8$ | $\delta_9$ | $\delta_{10}$ |
|------------|------------|------------|------------|------------|------------|------------|------------|------------|---------------|
| 7.69       | 7.35       | 7.49       | 7.27       | 4.27       | 1.94       | 1.55       | 1.25-1.45  | 0.91       | 5.03          |

**Table SI2.** AFM roughness of LB films obtained from 1:2 MC(1/2):AA solutions ( $\pi = 20$  mN/m, transfer ratio = 100)

| Layer Number | Roughness [ $\text{\AA}$ ] |     |
|--------------|----------------------------|-----|
|              | MC1                        | MC2 |
| 3            | 35                         | 20  |
| 9            | 40                         | 25  |
| 29           | 60                         | 45  |

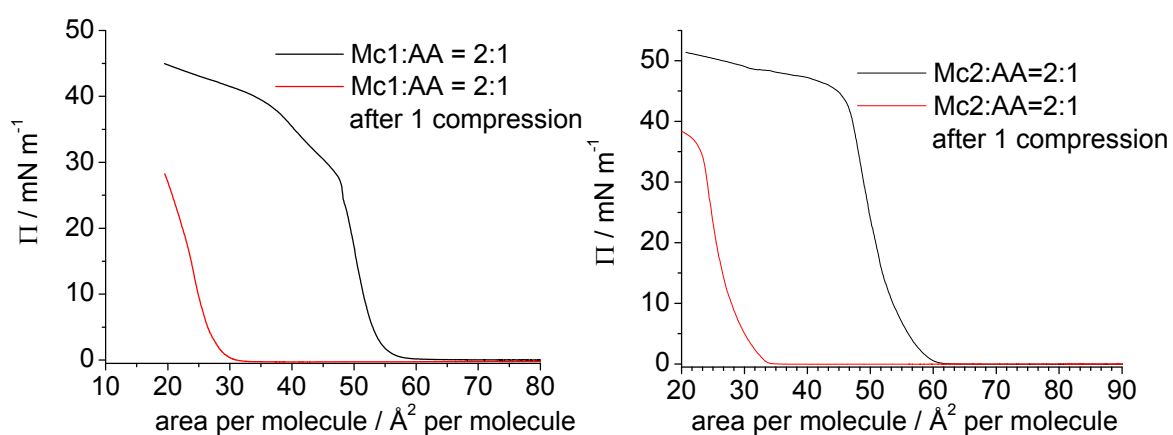

**Figure SI1.** Irreversibility of surface-pressure( $\pi$ )/area-per-molecule isotherms for 2:1 MC(1/2):AA mixtures.  $T = 20$  °C.

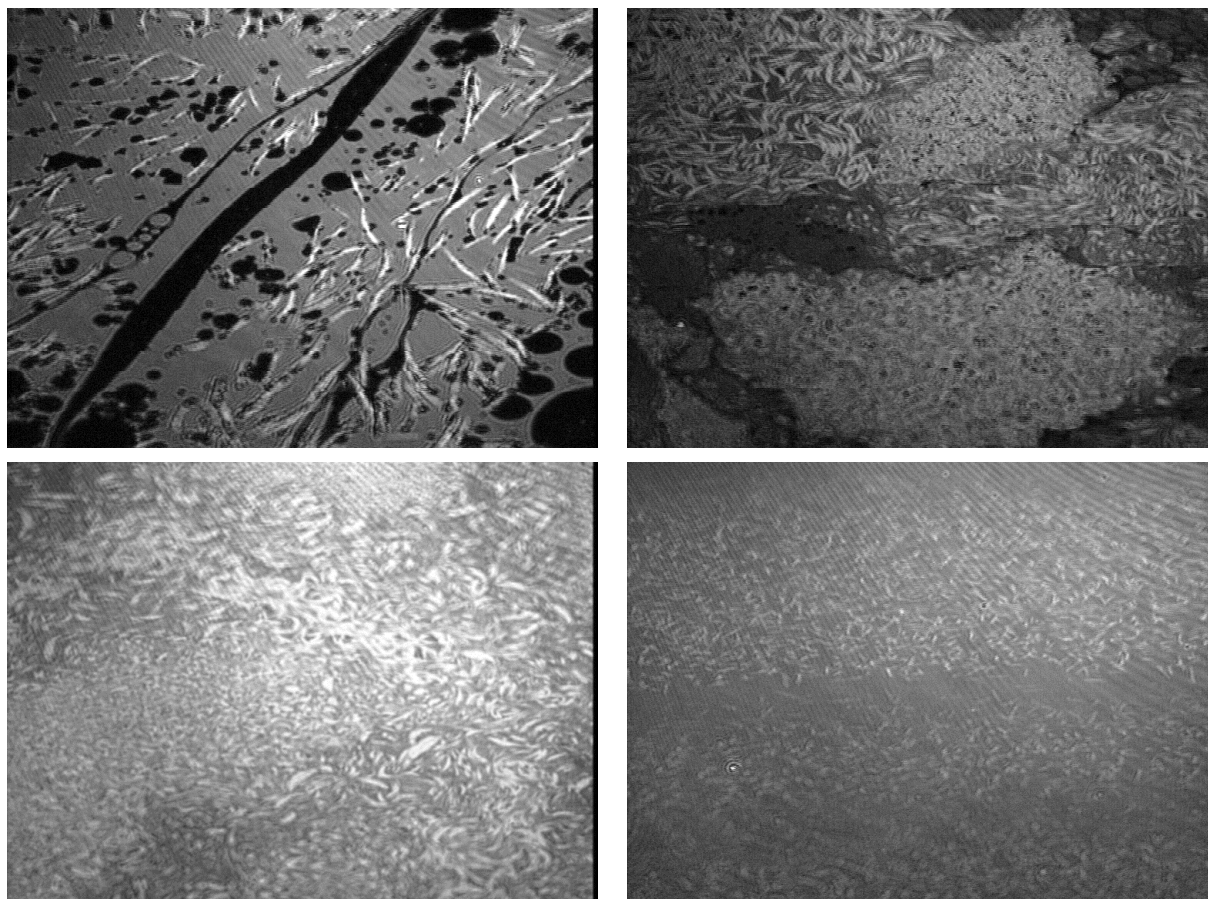

**Figure SI2.** Images of floating MC1 films taken at surface pressures 0.1, 3, 10 and 25 mN/m. The window width is 450  $\mu\text{m}$ .

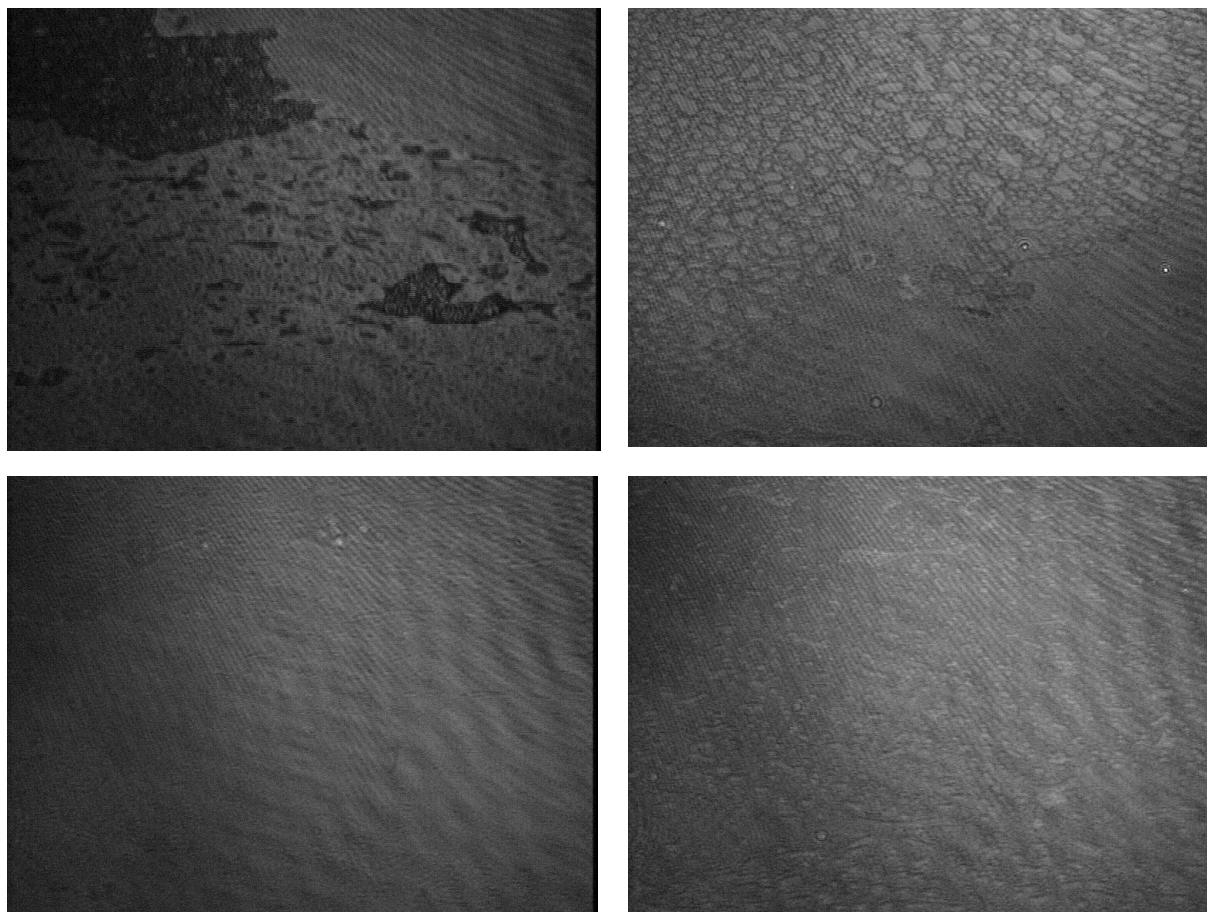

**Figure SI3.** Images of the MC1:AA 1: 2 mixture floating films taken at surface pressures 0, 10, 15 and 32 mN/m. The window width is 450  $\mu\text{m}$ .

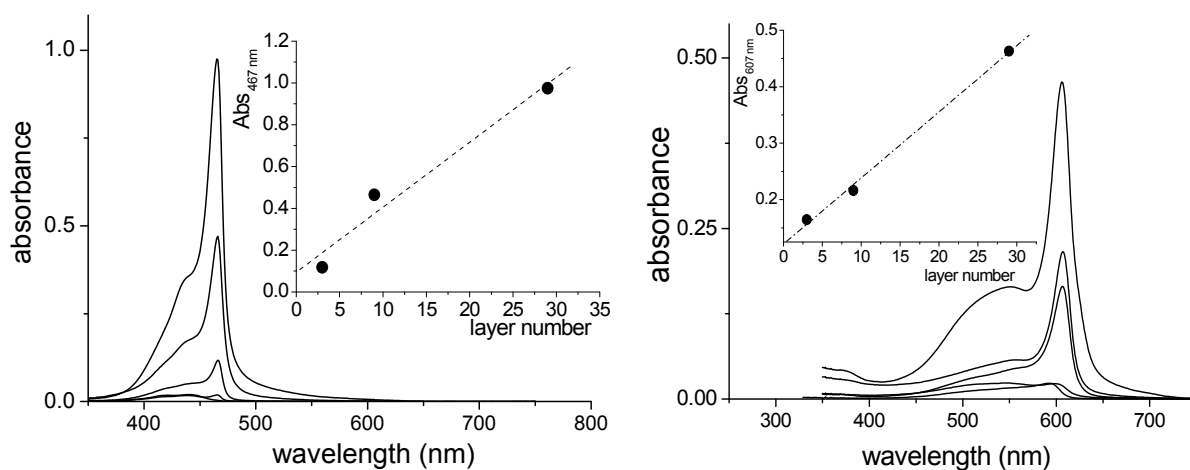

**Figure SI4.** UV-vis absorption spectra of LB films obtained with 1:2 MC:AA mole ratio: effect of the number of deposited layers. Left: MC1, right: MC2. Insets: maximum absorbances of the J bands vs. number of layers.

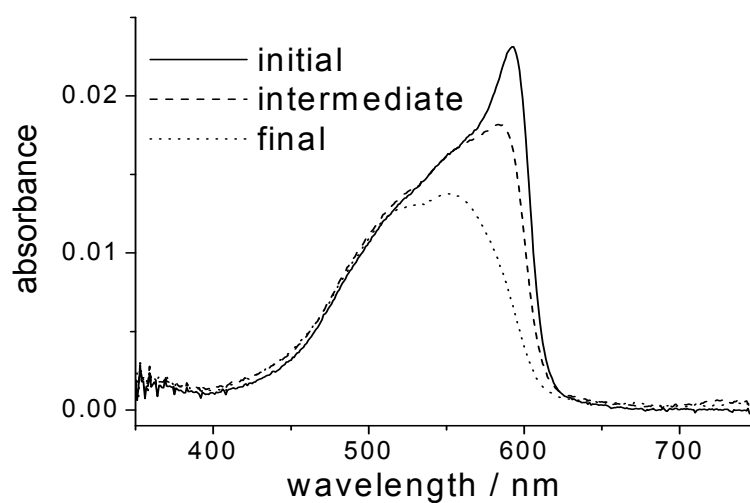

**Figure SI5.** Ambient-light induced photodegradation of an LB monolayer obtained from a 1:2 MC2:AA mixture.

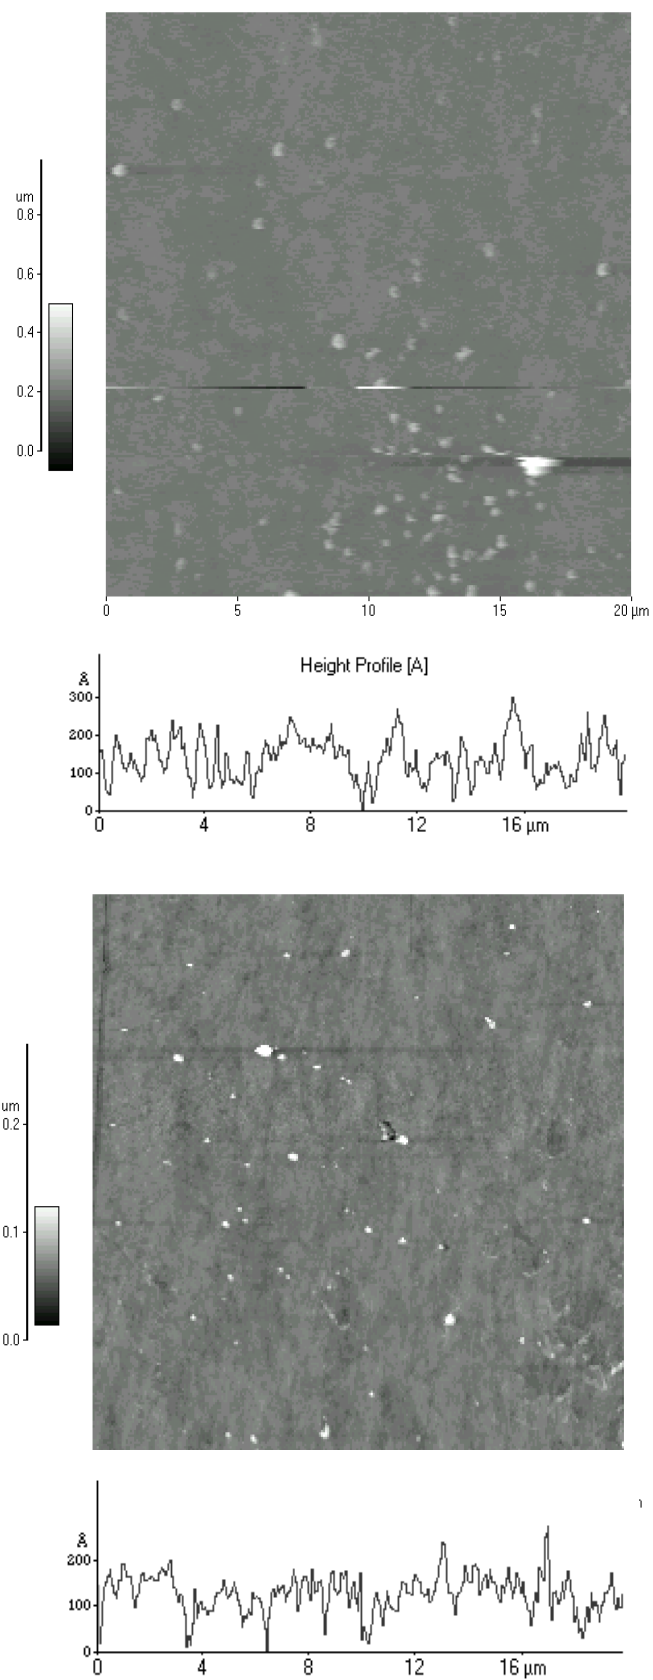

**Figure SI6.** AFM images of 29-layer LB films obtained from 1:2 MC(1/2):AA solutions. MC1 on top.

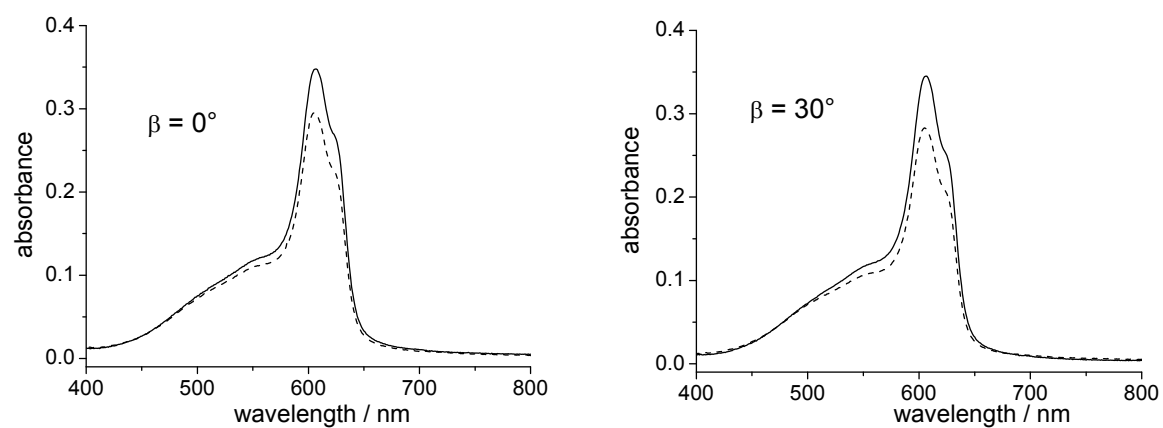

**Figure SI7.** Linear dichroism of a 9-layer film deposited from a 1:2 MC2:AA mixture at 25 mN  $\text{m}^{-1}$ . Light polarization: vertical (solid), horizontal (dashed).
